**THIOPENTAL** The duration of action of thiopental and pentobarbital has been studied in white rats. After a single dose of thiopental (15 mg./kg.), the brain equilibrated immediately with a very high plasma level which then fell as the drug was distributed in total body water and tissue. Pentobarbital equilibration, however, was delayed. Consequently the brain concentration rose to a plateau and no dose of pentobarbital produced a rapidly falling brain level. These findings explain why thiopental is an ultra short acting anesthetic while pentobarbital is not. Because of its poor blood supply, the fat takes up thiopental too slowly to be of great importance in the events that terminate the anesthetic action of a single small dose of thiopental. (*Goldstein, A., and Aronow, L.: The Durations of Action of Thiopental and Pentobarbital, J. Pharmacol. & Exper. Therap. 128: 1 (Jan.) 1960.*)

**NARCOTIC ANTAGONISTS** The ability of rat liver preparations to demethylate morphine and similar compounds has been examined. Repeated administration of levorphan, dextrophan, and morphine reduced the capacity of the liver to demethylate morphine. Neither levallorphan nor nalorphine reversed this narcotic-induced retardation of demethylation. (*Mannering, G. J., and Takemori, A. E.: The Effect of Repeated Administration of Levorphan, Dextrophan and Morphine on the Capacity of Rat Liver Preparation to Demethylate Morphine- and Morphinan-Type Analgesics, J. Pharmacol. & Exper. Therap. 127: 187 (Nov.) 1959.*)

**ACUTE TOLERANCE** Alcohol, paraldehyde, thiopental, pentobarbital, and trichloroethanol have been compared with respect to the development of acute tolerance by determining the plasma concentrations of the drug in dogs at the time of disappearance of ataxia after intravenous doses ranging from those causing only a short-lived ataxia to those producing the counterpart of deep anesthesia. The largest amount of tolerance which occurred with any of these drugs was reflected by an increase of about 100 per cent in the plasma concentration of the drug. The amount of acute tolerance observed was dependent upon the level of neurological de-

range being examined. If ability to walk was the criterion, the maximal tolerance to alcohol was only 30 per cent increase in plasma concentration of drug as compared with a 100 per cent increase when disappearance of ataxia was the end point. (*Maynert, E. W., and Klingman, G. I.: Acute Tolerance to Intravenous Anesthetics in Dogs, J. Pharmacol. & Exper. Therap. 128: 192 (Feb.) 1960.*)

**CONSCIOUSNESS** Twenty psychiatric patients all exhibiting symptoms of tenseness and anxiety were given hydroxydione 0.5 to 1 mg. intravenously as Presuren (Schering, Berlin) in 10 ml. of saline. During awakening when sleep spindles were still present on the EEG, the patients responded to simple commands, but could not talk and later remembered this fact. Next the patients could answer simple questions but not complicated ones. Sleep was not followed by depression and patients had no amnesia for the post sleep interview. (*Benaim, S.: Use of Hydroxydione in Psychiatry, Brit. Med. J. 2: 801 (Oct. 24) 1959.*)

**ANESTHESIA AND CONSCIOUSNESS** The author reviews the evidence from his own work and that of others bearing on the problem of general anesthesia and loss of consciousness and shows that clinical evidence from traumatic, infectious, degenerative and neoplastic disturbances as well as animal experiments using brain sections, electrical recording and stimulation, local destruction and the injection of small amounts of various drug into the lateral ventricles can all be interpreted as showing that the ascending reticular activating system is intimately concerned with sleep, pain perception and sustained awareness. (*Feldberg, W.: A Physiological Approach to the Problem of General Anaesthesia and of Loss of Consciousness, Brit. Med. J.: 2: 771 (Oct. 24) 1959.*)

**DIGITALIS INTOXICATION** Digitalized patients treated with chlorothiazide or similar diuretics must be closely observed since such toxicity (1) rarely includes gastro-intestinal symptoms; (2) is not necessarily accompanied by hypopotassemia; and (3) is not prevented by routine ingestion of moderate amounts of

potassium salts. The total cumulative potassium deficit may be considerable and not corrected for some time after chlorothiazide is discontinued, thereby continuing the state of myocardial vulnerability and digitalis hypersensitivity. (*Richman, J. L.: Digitalis Intoxication Induced by Chlorothiazide, Bull. Tufts-New England Medical Center 6:18 (Jan.-Mar.) 1960.*)

**MUSCLE RELAXANT** The effects of edrophonium and choline were compared with those of the depolarizing substances acetylcholine, decamethonium, and suxamethonium in tibialis anterior muscles of cats. Both edrophonium and choline were more potent antagonists to paralysis by tubocurarine than could be accounted for by their ability to stimulate the motor end plates directly. Previous administration of benzoquinonium abolished the antagonistic action to tubocurarine of normally effective doses of edrophonium and reduced that by choline. These anti-curare compounds do not appear to act by cholinesterase inhibition, nor by an increase in the sensitivity of the motor end plates. A presynaptic mechanism of action is suggested. (*Blaber, L. C., and Bowman, W. C.: A Comparison Between the Effects of Edrophonium and Choline In the Skeletal Muscles of the Cat, Brit. J Pharmacol. 14:456 (Dec.) 1959.*)

**LIGNOCAINE** Lignocaine, a local anesthetic agent, in a dose of 1 to 2 mg./kg. of body weight to dogs increased cardiac output due to a rise in both heart rate and stroke volume. Arterial blood pressure was elevated as contrasted to the fall produced by procaine. Central blood volume was increased, but central venous pressure, total peripheral resistance and the ventilation perfusion ratio were decreased. In cross circulation experiments it was demonstrated that the primary site of action of lignocaine on cardiac output was central. (*Kao, F. F., and Jalar, U. H.: The Central Action of Lignocaine and its Effect on Cardiac Output, Brit. J. Pharmacol. 14: 552 (Dec.) 1959.*)

**OXYGEN TOXICITY** An investigation was carried out which indicated that the inhalation of oxygen at a partial pressure of 418 mm. Hg

(equivalent to breathing 55 per cent oxygen at sea level) for a period of seven days without marked effect on the general appearance, activity, and physical well being of six healthy men. The following signs of pulmonary irritation which occurred during the studies indicate that the tolerable human limitations to higher than normal oxygen concentrations may have been approached: substernal tightness, decrease in vital capacity in two subjects, and the occurrence of an area of probable atelectasis in one subject. Neither blood and urine studies, nor the measurement of pulse and respiration were of any conclusive help in determining the presence of oxygen toxicity. (*Michel, E., and others: Effect of Continuous Human Exposure to Oxygen Tension of 418 mm. Hg for 168 Hours, Aerospace Medicine 31: 138 (Feb.) 1960.*)

**AUTONOMIC GANGLIA** Experimental evidence supports the view that histamine 5-hydroxytryptamine and pilocarpine stimulate sympathetic ganglion cells of the cat by a mode of action different from that of acetylcholine and other nicotine-like substances. Therefore, these agents are described "non-nicotinic ganglion-stimulating substances." The ganglionic effects of these agents are abolished by depolarization of the ganglion cells but not by competitive blockade of the acetylcholine receptors. These substances seem to attach themselves to specific receptors of the ganglion cells. (*Trendelenburg, U.: Non-Nicotinic Ganglion-Stimulating Substances, Fed. Proc. 18: 1001 (Dec.) 1959.*)

**CEREBROSPINAL FLUID** The fate of drugs introduced directly into the cerebrospinal fluid of rabbits has been studied. Substances such as thiopental, introduced into the cerebrospinal fluid, find their way into the blood stream by either diffusion into the brain, by crossing the pia mater and the ependyma of the ventricles, or by flowing along the perivascular spaces, thence into the blood stream. A more important route, however, is by direct passage from the subarachnoid space into blood. (*Mayer, S. E, Maickel, R. P, and Brodie, B. B.: Disappearance of Various Drugs from the Cerebrospinal Fluid, J. Pharmacol. & Exper. Therap. 128: 41 (Jan.) 1960.*)
